# Supplementary material for: Prognostic role of METTL1 in glioma
Source: PubMed Central journal article supplement (PMC8627054; doi:10.1186/s12935-021-02346-4), 2021-11-27

**a**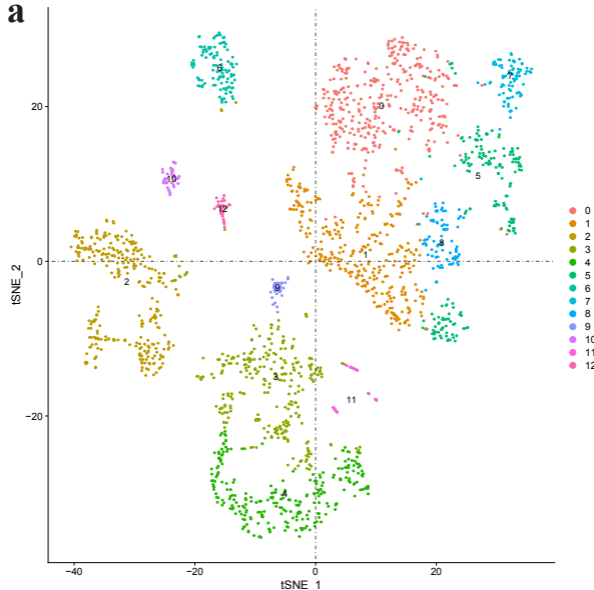**b**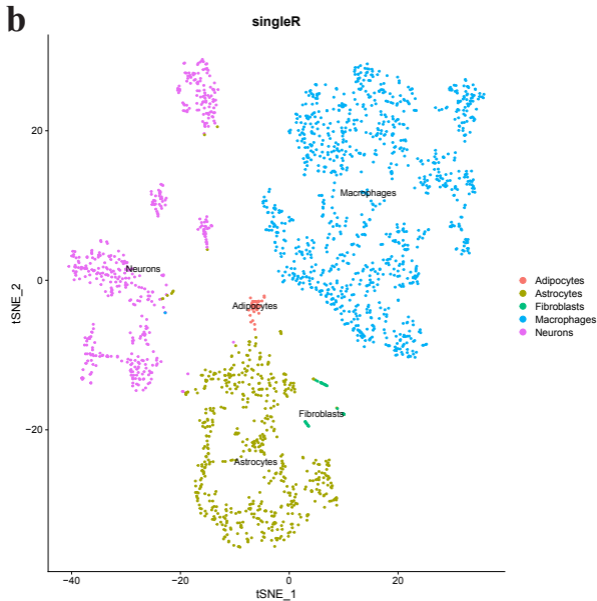**c**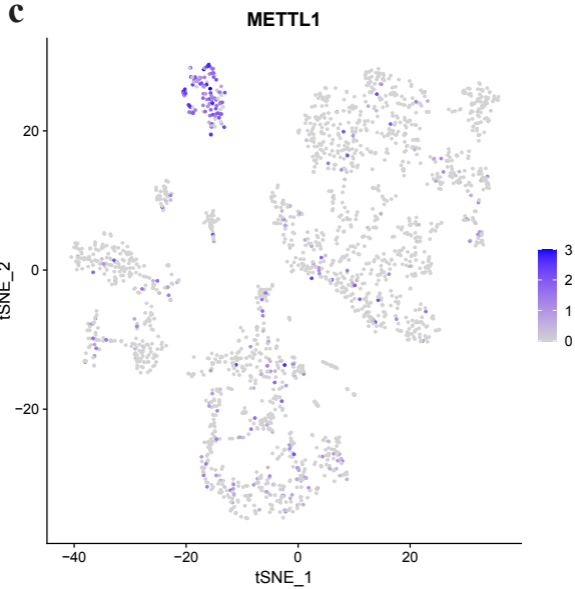

Supplement: 12935_2021_2346_MOESM3_ESM.pdf [file 12935_2021_2346_MOESM3_ESM.pdf]
